# Supplementary material for: FISH in chips: turning microfluidic fluorescence in situ hybridization into a quantitative and clinically reliable molecular diagnosis tool
Source: Royal Society of Chemistry journal article supplement (doi:10.1039/c4lc01059k), 2014-11-19
Supplement: c4lc01059k1.pdf [file c4lc01059k1.pdf]

## Title:

---

FISH in Chips: Turning microfluidic Fluorescent In Situ Hybridization into a quantitative and clinically reliable molecular diagnosis tool.

*Karla Perez-Toralla et al.*

## Supplementary Information

---

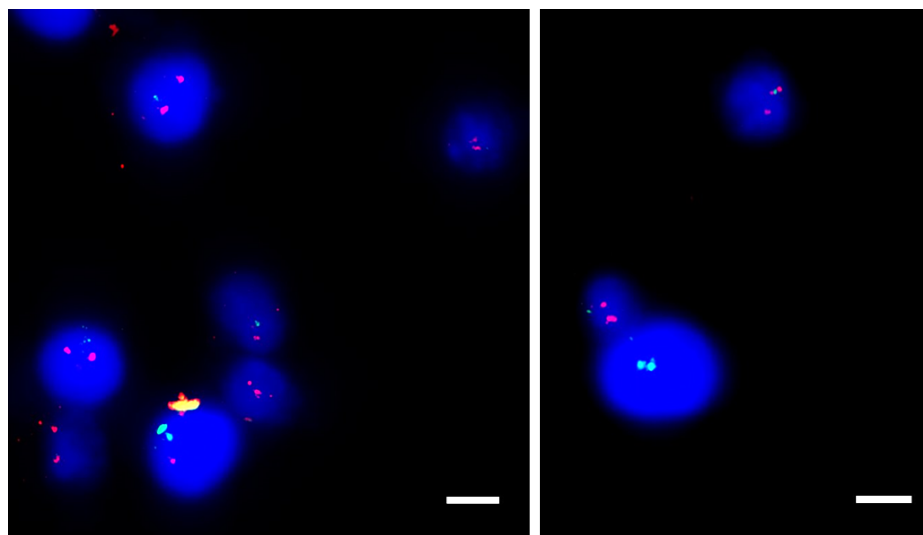

Figure S1 : FISH results for HER2 typing of cells from a pleural effusion from a breast cancer patient (sample A) on COC chip. Two micrographs from different locations on the same chip (scale bar=5  $\mu\text{m}$ )
